# Supplementary material for: Administration of low-dose combination anti-CTLA4, anti-CD137, and anti-OX40 into murine tumor or proximal to the tumor draining lymph node induces systemic tumor regression
Source: Springer Nature journal article supplement (doi:10.1007/s00262-017-2059-y), 2017-09-13
Supplement: MOESM1 [file 15056202]

Supplementary Materials

Cancer Immunology, Immunotherapy (submitted in 2017) – Jonathan Hebb *et al*.

**Supplementary Figure 1:**


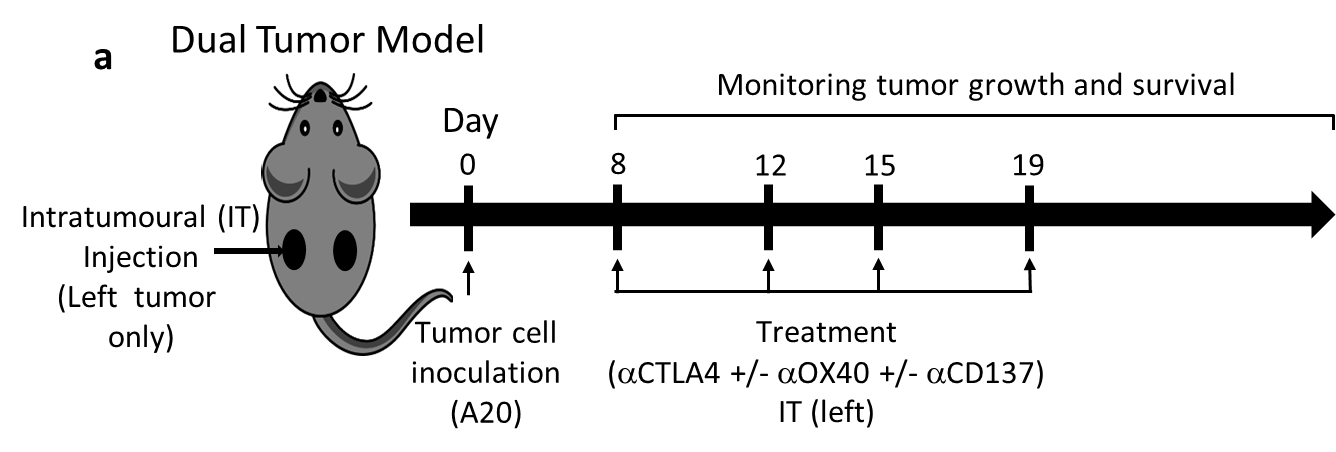


**
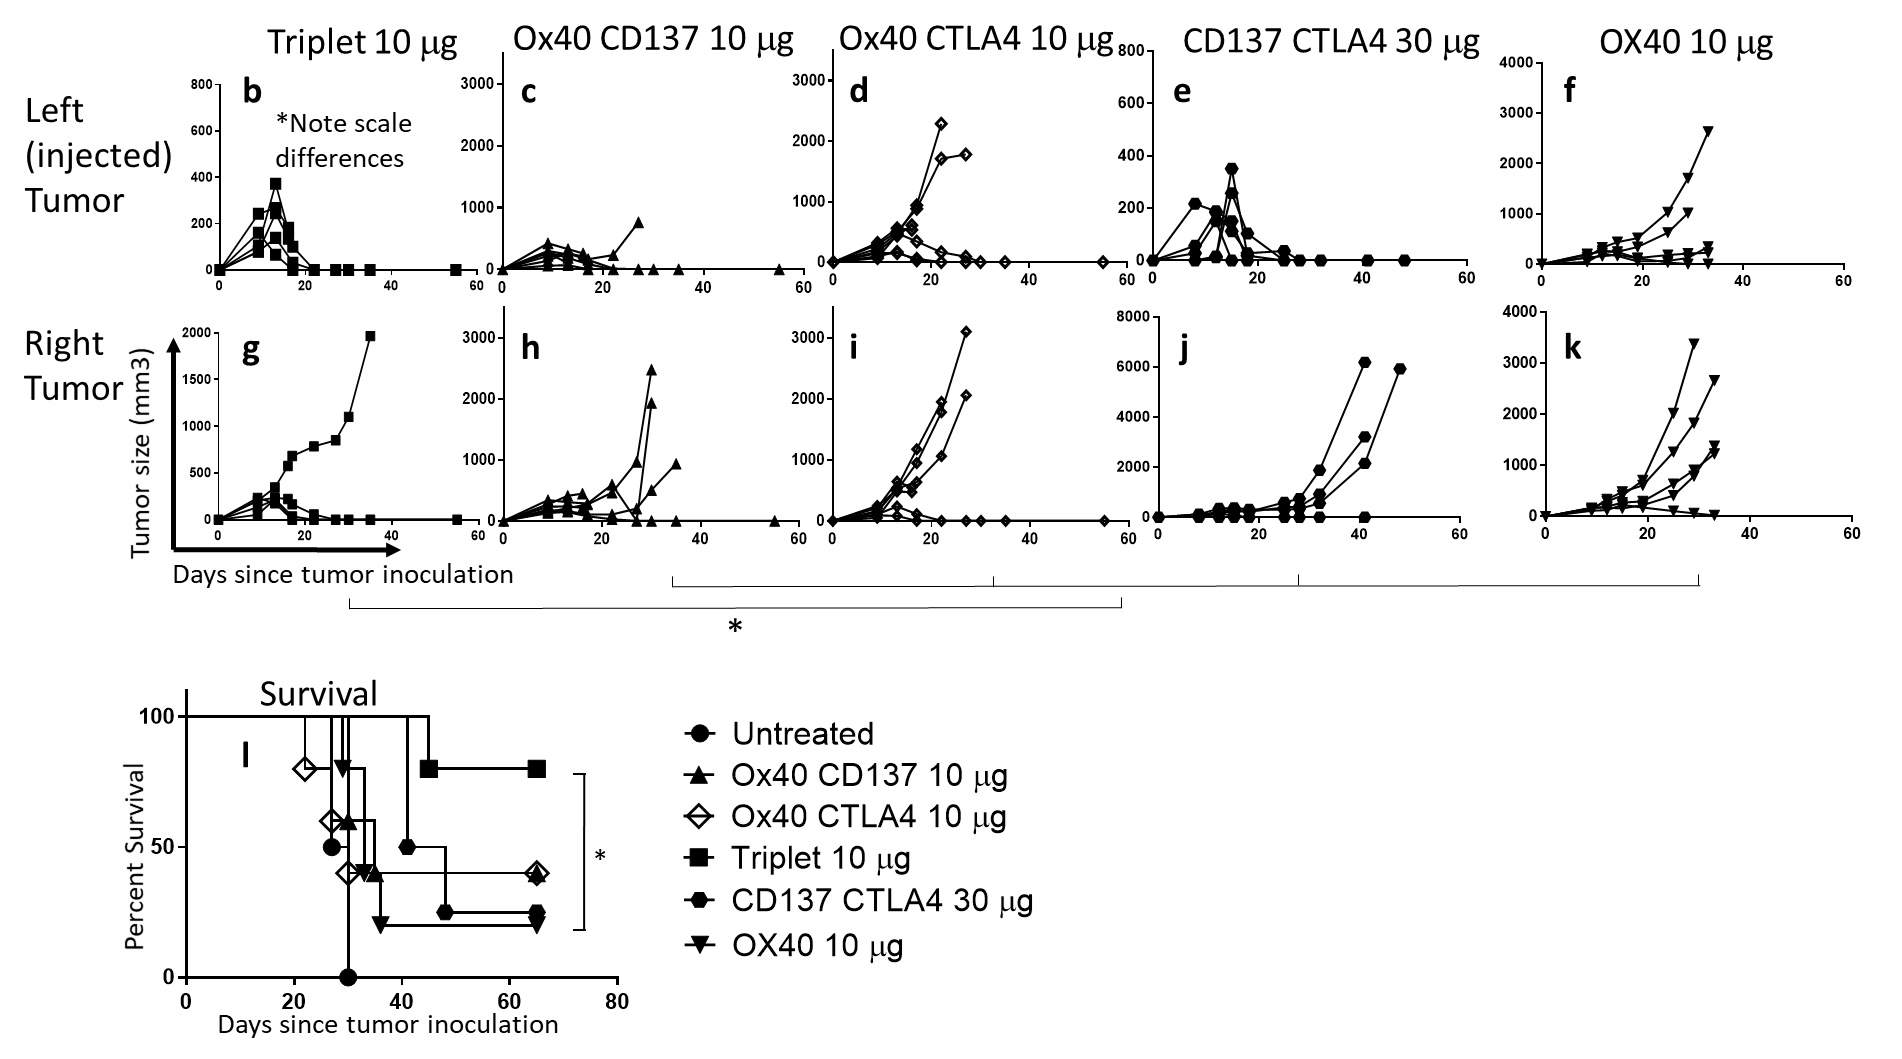
**

**Supplementary Figure 1**: Doublets are not as effective as triplets at low doses. (**a**) Mice were treated with 4 biweekly doses of the triple combination CD137, OX40 and CTLA4 at the 10 g dose, or combinations of doublets at either 10 or 30 g each or αOX40 alone at 10 µg. Agents were delivered intratumorally to the left tumor of a dual tumor A20 lymphoma model. Tumor growth was measured by caliper of the injected (**b-f**) or non-injected (**g-k**) side. (**l**) Survival curve. n=5 per group (n=4 for OX40 CD137 10g group, one mouse died of anesthesia complications prior to treatment and was not included), ‘*’denotes p<.05, students t-test (tumor growth) or Mantel-Cox test (survival)

**Supplementary Figure 2:**

**
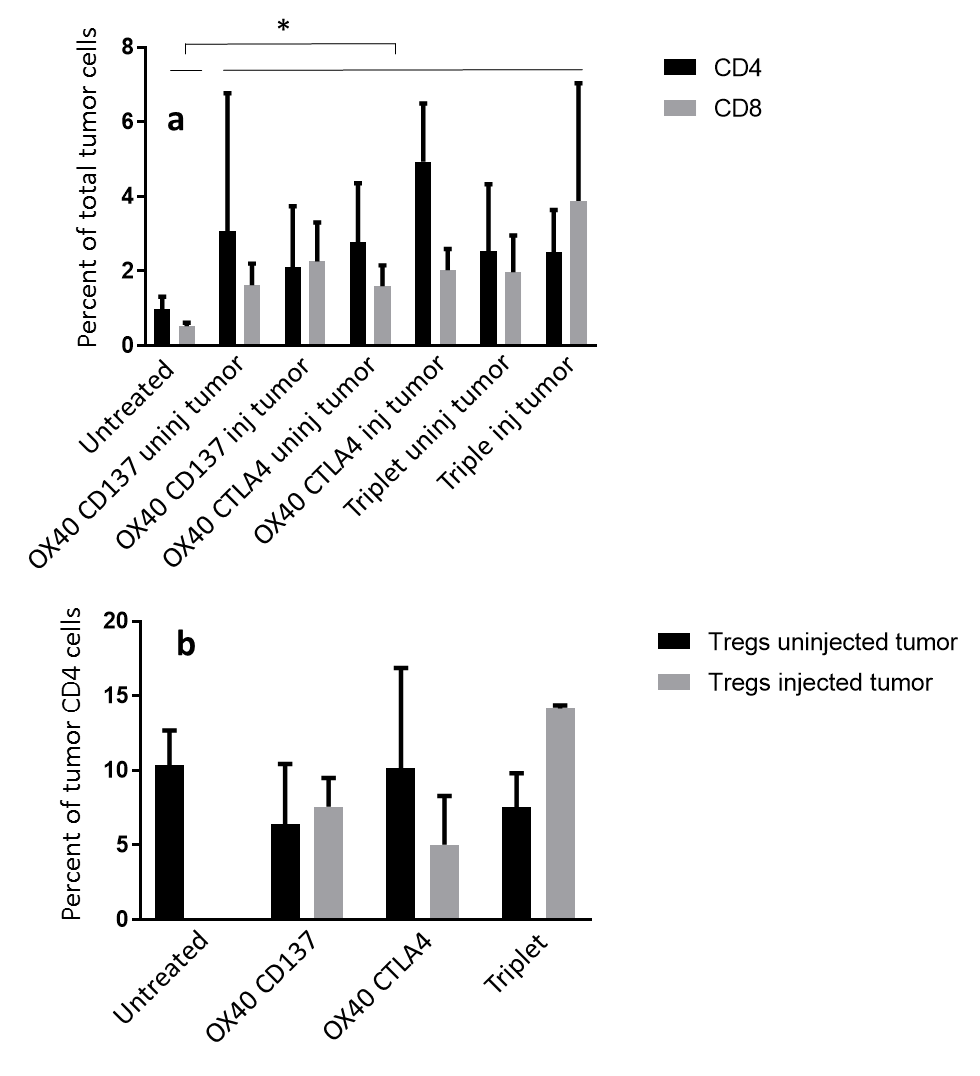
**

**Supplementary Figure 2:** IntratumoralCD4 and CD8 T-cells are proportionately increased relative to total tumor cells in treated mice and the relative percentage of Tregs is similar.A dual tumor A20 model was used as in **Supplementary Figure 1a**.Mice were sacrificed 48 hours after 2 biweekly doses of the respective combination at 10 g each delivered by intratumoral injection to the left tumor.Tumor homogenates were stained and analyzed by flow cytometry. **(a)** shows the number of intratumoral CD4 and CD8 cells as a percentage of total tumor cells. Cells were analyzedin duplicate on 2 independent flow cytometry runs. (**b**) shows Tregs (CD4/CD25/FoxP3+) as a percentage of intratumoral CD4 cells. N=3 for untreated and 2 for treated groups. ‘*’ denotes p<.05, student t-test

**Supplementary Figure 3:**

**
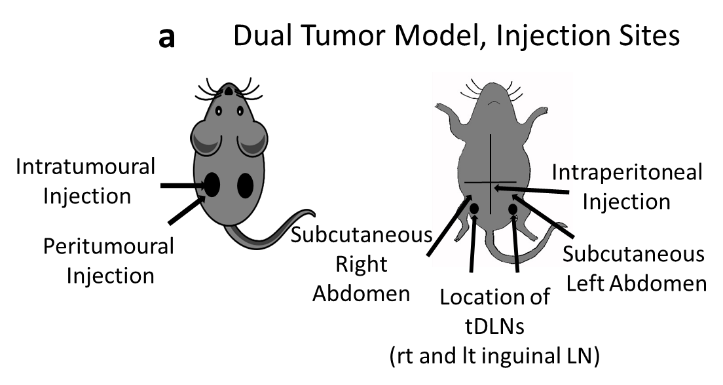
**

**
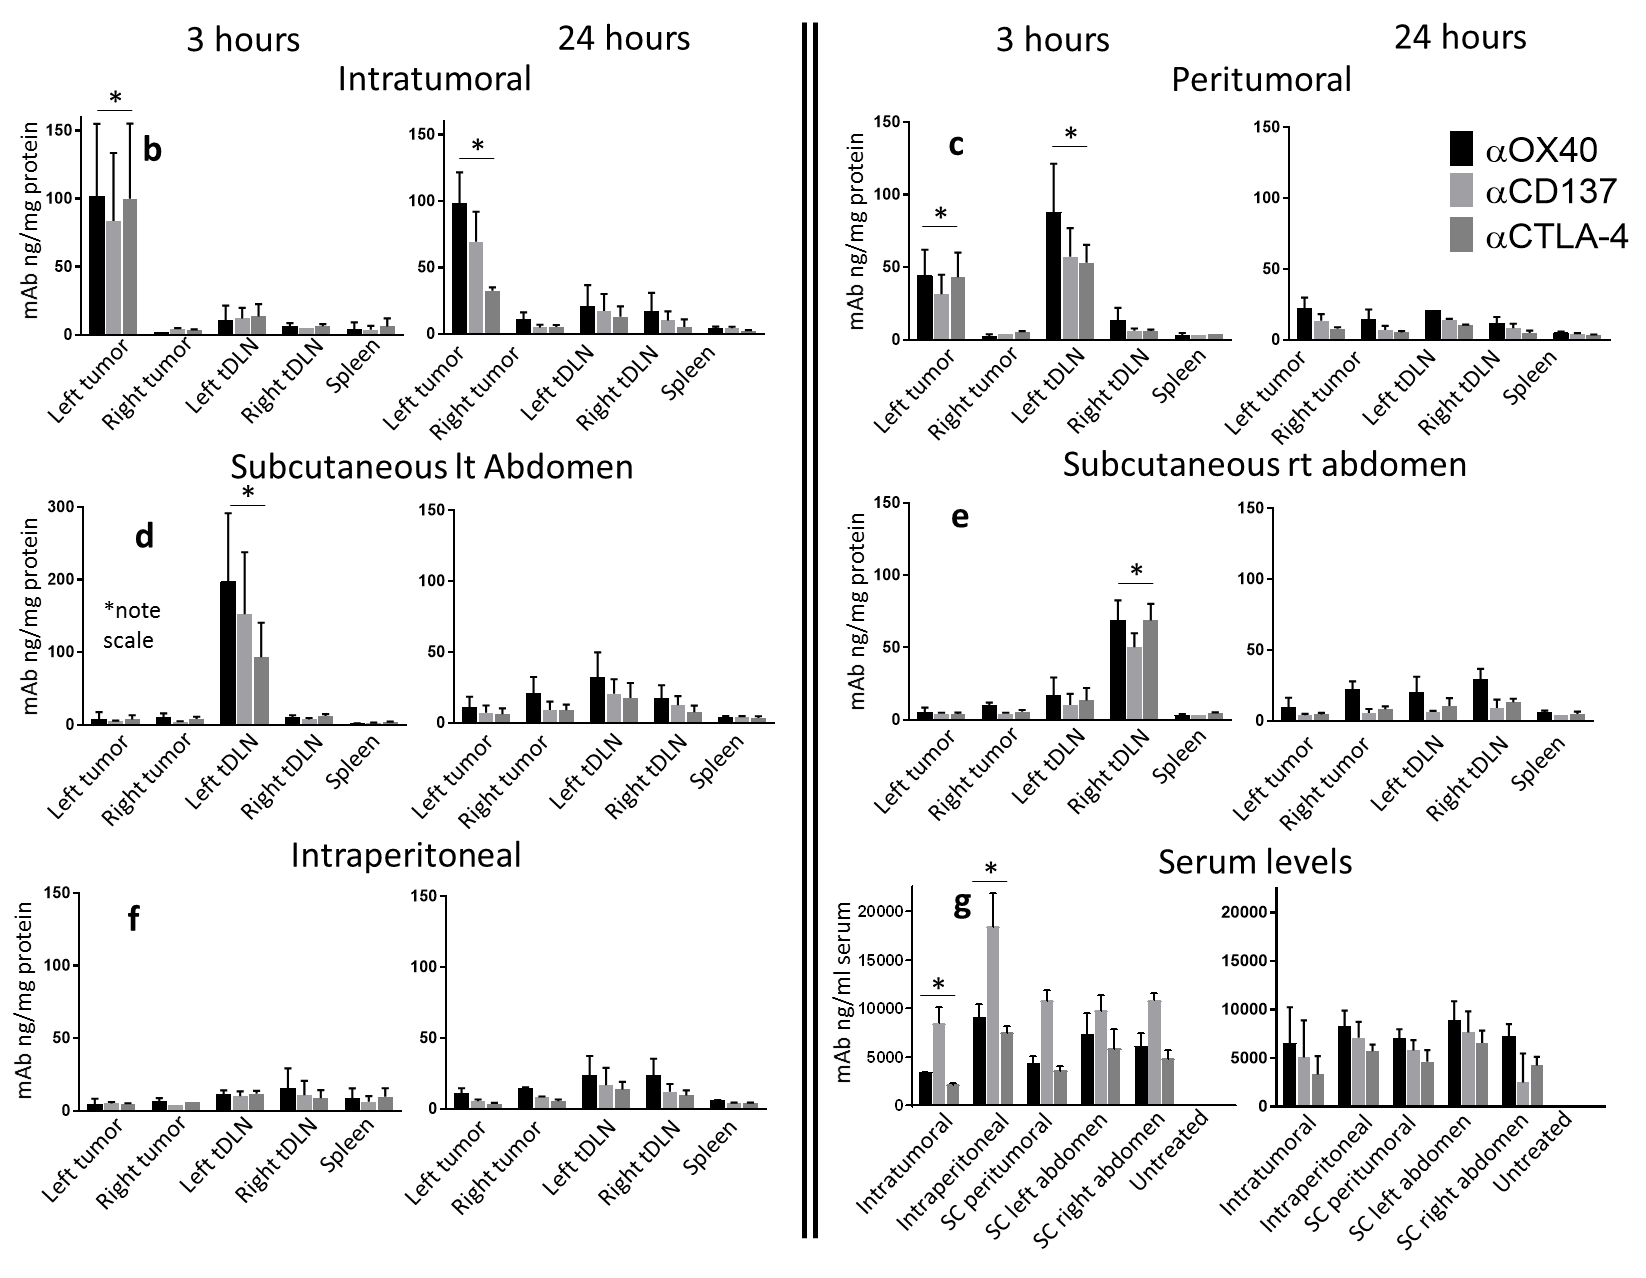
**

**Supplementary Figure 3**: Monoclonal antibody (mAb) biodistribution studies, 3 and 24 hours post injection, confirm that antibodies concentrate in target structures. (**a**) A dual tumor A20 model was used. Mice were injected once with the triple combination (CD137, OX40 and CTLA4) at a dose of 10 g each. Routes of administration for the different groups are as shown. Mice were sacrificed 3 and 24 hours post-injection and tumor, tDLN, non-tDLN, blood and spleen were collected. Antibody levels in the different compartments were analyzed by ELISA at 3 hours (right columns) and 24 hours (left columns) (**b-g**). Values are expressed as mean +/- SD. n=3 mice per group per injection site. tDLN = tumor draining lymph node; SC = subcutaneous. ‘*’ denotes p<.05, student’s t-test. Data for 6 hour time point shown in **Figure 6**

**Supplementary Table 1**: Toxicity profile for individual mice treated with 4 doses of the triple combination by intratumoral injection at 30 g or 10 g each

| **Parameter** | **Normal range** | **Units** | **Triple 30g 1** | **Triple 30g 2** | **Triple 30g 3** | **Triple 10g 1** | **Triple 10g 2** | **Untx**  **1** | **Untx**  **2** |
| --- | --- | --- | --- | --- | --- | --- | --- | --- | --- |
| WBC | 5.5-9.3 | K/l | 9.58 | 6.32 | 5.33 (L) | 5.13 (L) | 4.58 (L) | 3.68 (L) | 3.59 (L) |
| Neutrophils | 825-2604 | Cells/l | 1437 | 442 (L) | 586 (L) | 616 (L) | 1145 | 846 | 862 |
| Lymphocytes | 3685-7812 | Cells/l | 7489 | 5056 | 4477 | 4309 | 3206 | 2650 (L) | 2585(L) |
| Eosinophils | 0-279 | Cells/l | 862 (H) | 569 (H) | 213 | 103 | 137 | 37 | 89 |
| Platelets | Adequate  (by estimate) | N/A | Ade-quate | Ade-quate | Ade-quate | Ade-quate | Ade-quate | Ade-quate | Ade-quate |
| AST | 192-388 | U/L | 92 (L) | 86 (L) | 137 (L) | 72 (L) | 91 (L) | 188 | 543 |
| ALT | 76-160 | U/L | 49 (L) | 44 (L) | 41 (L) | 37 (L) | 46 (L) | 62 (L) | 90 |
| Alk Phos* | 171-183 | IU/L | 144 (L) | 229 (H) | 188 (H) | 216 (H) | 238 (H) | 149 (L) | 85 (L) |
| Tot bili | N/A | mg/dL | .1 | .1 | 0 | 0 | .1 | .1 | 0 |
| BUN | 20.3-24.7 | mg/dL | 20 (L) | 15 (L) | 19 (L) | 15 (L) | 20 (L) | 19 (L) | 24 |
| Creatinine | .1-1.1 | mg/dL | .4 | .4 | .2 | .4 | .2 | .3 | .4 |

* Several values are marginally high but would not be considered clinically significant
